1         **Stable sub-complexes observed *in situ* suggest a modular assembly pathway of the**  
2                                 **bacterial flagellar motor**

3         Mohammed Kaplan<sup>1</sup>, Poorna Subramanian<sup>1</sup>, Debnath Ghosal<sup>1</sup>, Catherine M. Oikonomou<sup>1</sup>, Sahand Pirbadian<sup>2</sup>, Ruth  
4                 Starwalt-Lee<sup>3</sup>, Jeffrey A. Gralnick<sup>3,4</sup>, Mohamed Y. El-Naggar<sup>2</sup> and Grant J. Jensen<sup>1,5,6</sup>

5                 <sup>1</sup>Division of Biology and Biological Engineering, California Institute of Technology, Pasadena, CA 91125.

6         <sup>2</sup>Department of Physics and Astronomy, Biological Sciences, and Chemistry, University of Southern California, Los  
7                                 Angeles, CA 90089.

8         <sup>3</sup>BioTechnology Institute and <sup>4</sup>Department of Plant and Microbial Biology, University of Minnesota – Twin Cities,  
9                                 St. Paul, Minnesota 55108.

10                 <sup>5</sup>Howard Hughes Medical Institute, California Institute of Technology, Pasadena, CA 91125.

11                                 <sup>6</sup>Corresponding author: [jensen@caltech.edu](mailto:jensen@caltech.edu)

12         **Abstract**

13         The self-assembly of cellular macromolecular machines such as the bacterial flagellar motor requires the spatio-  
14         temporal synchronization of gene expression, protein localization and association of a dozen or more unique  
15         components. In *Salmonella* and *Escherichia coli*, a sequential, outward assembly mechanism has been proposed for  
16         the flagellar motor starting from the inner membrane, with each subsequent component stabilizing the last. Here,  
17         using electron cryo-tomography of intact *Legionella pneumophila*, *Pseudomonas aeruginosa* and *Shewanella*  
18         *oneidensis* cells, we observe stable outer-membrane-embedded sub-complexes of the flagellar motor. These sub-  
19         complexes consist of the periplasmic embellished P- and L-rings, in the absence of other flagellar components, and  
20         bend the membrane inward dramatically. Additionally, we also observe independent inner-membrane sub-  
21         complexes consisting of the C- and MS-rings and export apparatus. These results suggest an alternate model for  
22         flagellar motor assembly in which outer- and inner-membrane-associated sub-complexes form independently and  
23         subsequently join, enabling later steps of flagellar production to proceed.

24

## 25 Introduction

26 In order to move efficiently in their low-Reynolds-number environment<sup>1</sup>, bacteria have evolved a complex  
27 membrane-embedded nanomachine known as the bacterial flagellum which exploits the flux of ions across the  
28 membrane to generate a mechanical torque to rotate a long filament<sup>2-4</sup>. In general, the bacterial flagellum consists of  
29 a cell-envelope-embedded motor, a hook and a filament. The motor consists of two parts: the rotor, which is  
30 composed of the basal body and the switch complex, and the stator (See<sup>5,6</sup> and references therein). In the canonical  
31 flagellar systems of *Salmonella enterica* and *Escherichia coli* the cell-envelope-spanning basal body consists of  
32 multiple rings: the MS- (membrane/supramembrane) ring (formed by the protein FliF), the P- (peptidoglycan) ring  
33 (FlgI), and the L- (lipopolysaccharide) ring (FlgH). The P- and L- rings form a bushing that allows the flagellum to  
34 rotate within the cell wall and outer membrane. These rings surround the rod structure (FliE, FlgB, FlgC and FlgF).  
35 The C- (cytoplasmic) ring consists of three proteins (FliG, FliM and FliN) and forms the switch complex which is  
36 responsible for switching the direction of flagellar rotation between clockwise and counterclockwise. In *E. coli* and  
37 *Salmonella*, the stator is formed by a complex of two proteins, MotA and MotB. While MotB interacts with the  
38 peptidoglycan through a peptidoglycan-binding domain<sup>7-9</sup>, MotA interacts with FliG to generate the torque required  
39 for flagellar rotation<sup>8</sup>. The extracellular parts of the bacterial flagellum comprise the hook, which acts as a universal  
40 joint, and the filament, which serves as a helical propeller. The motor also has a type III secretion system (T3SS)  
41 export apparatus consisting of six proteins (FliH, FliI, FliJ, FlhA, FlhB, FliP, FliQ and FliR) located at the inner  
42 membrane. See Fig. S1 for a schematic of these components.

43  
44 High-resolution structures have been solved for many components of the flagellar motor by X-ray crystallography,  
45 NMR spectroscopy and cryo-EM single particle reconstruction, and structures of the purified *Salmonella* motor have  
46 been solved by electron microscopy<sup>10,11</sup>. Unfortunately, due to the large size of the complex and its integral position  
47 spanning the cell envelope, flagellar motors lose components when purified. Recently, the advent of electron cryo-  
48 tomography (ECT)<sup>12,13</sup> allowed our group and others to reveal the *in situ* structures of various bacterial flagellar  
49 motors within intact cells at macromolecular (~ 4 nanometer) resolution. These studies showed the diversity of  
50 flagellar motors in different species adapted to unique external environments<sup>14-18</sup>. For instance, some species  
51 elaborate their P- and L-rings with additional periplasmic components, including the T-ring (MotX and MotY) and  
52 H-ring (FlgO, FlgP and FlgT)<sup>19,20</sup>.

53 The bacterial flagellum offers a striking example of the self-assembly process of supramolecular complexes in the  
54 cell, and is of interest to disciplines ranging from evolutionary biology to nanotechnology<sup>21</sup>. Assembly requires huge  
55 amounts of cell energy<sup>22,23</sup>. Our current understanding of flagellar assembly comes from studies of two enteric  
56 species of Gram-negative bacteria, *E. coli* and *Salmonella*, which suggest an inside-to-outside sequential assembly  
57 process starting from the export apparatus (FlhA) and MS-ring (FlhF) followed by the C-ring proteins and the export  
58 apparatus, the rod, the P- and L-rings, the hook and finally the filament<sup>22,24-26</sup>. The process is thought to be a  
59 cooperative one whereby the addition of each new component stabilizes its antecedent<sup>26</sup>. The proteins forming the  
60 rod, the hook and the filament are secreted through the T3SS export apparatus<sup>22</sup>. The P-, L-, T- and H-ring proteins,  
61 however, are secreted to the periplasm through the conventional Sec pathway<sup>22,27-29</sup>. Interestingly, the P- and L-ring  
62 proteins in *S. typhimurium* were found to exist in a stable state in the periplasm in the absence of the inner  
63 membrane-associated complex<sup>28</sup>. Despite the stability and independent export of their components, it is thought that  
64 P- and L-rings form only once the assembling rod extends through the periplasm<sup>22</sup>.

65

66 By imaging intact cells of three non-enteric Gram-negative bacterial species, we describe here that the P/L-ring sub-  
67 complexes (with associated rings) and the inner membrane complex (constituting the C-ring, the MS-ring and the  
68 T3SS export apparatus) form stable independent sub-complexes, suggesting an alternative assembly model in which  
69 modules form independently and associate into a functional structure.

70

## 71 **Results & Discussion**

72 We recently reported the structure of the intact flagellar motor in three non-enteric Gammaproteobacteria species,  
73 *Legionella pneumophila*, *Pseudomonas aeruginosa* and *Shewanella oneidensis* MR-1 by ECT<sup>30</sup>. *L. pneumophila* and  
74 *P. aeruginosa* are human pathogens that cause serious pulmonary infections in which the flagellum is a key  
75 virulence factor<sup>31,32</sup>. *S. oneidensis* is a model system for studying extracellular respiration and is known for its  
76 production of multiheme cytochrome electron conduits and outer-membrane appendages<sup>33</sup>. All three species utilize a  
77 single, polar flagellum. We found that the flagellar motors of all three species contain elaborated P- and L-rings: *L.*  
78 *pneumophila* and *P. aeruginosa* have an extra periplasmic ring surrounding the P-ring, and *S. oneidensis* has both T-  
79 and H-rings surrounding its P- and L-rings, respectively<sup>30</sup>.

80 In addition to fully-assembled flagella, in tomograms of all three species we observed isolated outer membrane  
81 complexes similar to the periplasmic P- and L-rings and their associated rings (henceforth these complexes of the P-,  
82 L-rings and associated rings are referred to as PL sub-complexes) (Fig. 1). By performing sub-tomogram averaging  
83 of these sub-complexes to enhance the signal-to-noise ratio we confirmed that these were PL sub-complexes and  
84 that they lacked other flagellar components (Fig. 1 C, D, H, I, M and N; compare to averages of fully-assembled  
85 motors in 1 E, J and O). Compared to fully-assembled motors, PL sub-complexes had two striking features. First,  
86 they sharply curved the outer membrane inward into an inverted omega shape. The membrane remained continuous,  
87 however, and no pore was visible. Second, in *L. pneumophila* and *P. aeruginosa* two protein densities were seen  
88 extending downwards from the center of the sub-complexes (Figs. 1 C, D, H and I, purple densities). These densities  
89 were less clear in the case of *S. oneidensis* (Fig. 1 M). We speculate that these densities may play a role in docking  
90 the PL sub-complex to more proximal components. Previous ECT studies of the flagellar motor in other species may  
91 not have observed PL sub-complexes because they lack the ornamentation of the T- and/or H-rings, which enhance  
92 visibility.

93

94 In many *L. pneumophila* cells, we also observed an inner membrane complex constituting the C- and MS- rings and  
95 the T3SS export apparatus (referred to henceforth as the inner-membrane (IM) sub-complex) in the vicinity of the  
96 PL sub-complexes (Fig. 2 A-L and Movies S1 and S2). The lateral distance between the PL sub-complex and the IM  
97 sub-complex ranged from 60 nm to 5 nm (Fig. 2 D-L and Table S1). We also observed that the distance between the  
98 inner and outer membranes varied and that this variation correlated with the lateral distance between the sub-  
99 complexes; the more closely aligned the two sub-complexes were, the closer the inter-membrane distance was to the  
100 distance observed in fully-assembled flagella (35 nm) (Table S1 and Fig. S2). We never observed an IM sub-  
101 complex without a PL sub-complex in its vicinity. In 11 *L. pneumophila* cells, we found fully assembled motors  
102 lacking the hook and filament, but no motors with only the hook (and not the filament) were observed. In one  
103 tomogram of a lysed *L. pneumophila* cell, we found an example of a flagellar sub-complex where only the rod, the  
104 outer membrane complex, the hook and the filament were present without the C-ring and export apparatus (Fig. 2 M  
105 and N). Since secretion of the rod, hook and filament proteins into the periplasm requires the T3SS export apparatus,  
106 this must represent an intermediate stage of disassembly. This pattern is similar to what was previously seen in  
107 *Caulobacter crescentus* where the disassembly process is initiated by digestion of the C terminus of FliF, leaving the

108 rod, the hook and the filament as a stable sub-complex that is ejected into the medium<sup>34-37</sup>. In addition, the FliG and  
109 FliM components of the C-ring (which is connected to the export apparatus) were also shown to undergo proteolysis  
110 during the disassembly process in *C. crescentus*<sup>34,38</sup>.

111  
112 In tomograms of *P. aeruginosa* cells, we found (next to fully-assembled flagella and PL sub-complexes) examples  
113 of fully-assembled motors both without (5 cases) and with (3 cases) the hook (Fig. 3). The low number of particles  
114 in this state suggests a fast transition from the fully-assembled motor to the fully-assembled flagellum. Similarly, in  
115 four *S. oneidensis* cells we saw fully-assembled motors lacking the hook, next to fully-assembled flagella and PL  
116 sub-complexes (Fig. 4 A-E).

117  
118 To further investigate PL sub-complexes, we generated and imaged an *S. oneidensis* strain lacking the L-ring protein  
119 FlgH. As expected, no flagella or pre-formed PL sub-complexes were seen in tomograms of  $\Delta flgH$  cells (Movie S3).  
120 In a few cases, however, we did observe IM sub-complexes (3 examples) or the IM sub-complex with a rod and P-  
121 ring (5 examples) (Fig. 4 F-J). This indicates that the non-elaborated P-ring can form in the absence of the L-ring,  
122 but that FlgH is required for the flagellum to proceed outside the cell and for the full PL sub-complex to form. These  
123 results are consistent with studies in *E. coli* showing P-ring assembly in the absence of the L-ring<sup>39,40</sup>. Next, we  
124 investigated a strain lacking the flagellar filament. Previous studies showed that *S. oneidensis* cells lacking the  
125 flagellin proteins, FlaA and FlaB, are completely nonmotile<sup>41</sup>. In a  $\Delta flaA/B$  strain, we observed PL sub-complexes  
126 akin to those seen in wild type cells (Fig. 4 K-O). While no flagellar filaments were seen, as expected, in a few cells  
127 we observed fully-assembled motors with a hook (Fig. 4 P-T). We also frequently observed a complex comprising  
128 the PL sub-complex together with the rod and the hook, but no IM sub-complex or export apparatus, in the  $\Delta flaA/B$   
129 strain (examples in Fig. 4 U-Y). Again, we reasoned that this must be a disassembly intermediate, as the hook and  
130 rod proteins are secreted to the periplasm by the T3SS export apparatus. In many cases multiple copies of this  
131 disassembly product were present at the cell pole (Fig. 4W and Movie S4), suggesting an active process of  
132 attempted flagellar assembly and disassembly.

133  
134 Taken together, our observations from *L. pneumophila*, *P. aeruginosa* and *S. oneidensis*, summarized in Figure 5,  
135 suggest an alternative model of flagellar assembly that differs from the model previously suggested for

136 *Salmonella*<sup>24,25</sup>. Specifically, we found that in all three species, the P- and L-rings, together with their associated  
137 rings, formed an independent stable complex embedded in the outer membrane in the absence of other flagellar  
138 proteins. Moreover, in *L. pneumophila* and a *AflgH* mutant of *S. oneidensis* we found an independent IM sub-  
139 complex (C- and MS-rings with the export apparatus) embedded in the inner membrane. In *L. pneumophila*, this IM  
140 sub-complex was found in the vicinity of the PL sub-complex, suggesting a find-and-capture assembly mechanism  
141 in which the two sub-complexes form independently and come together, allowing flagellum formation to proceed.  
142 Our results suggest that once the two sub-complexes join, the transition to the fully-assembled flagellum is rapid, as  
143 reflected by the low number of particles found in intermediate states. This is in accordance with previous  
144 observations<sup>42</sup>.

145  
146 We propose that the PL sub-complexes are the first to assemble since we observed many examples of isolated PL  
147 sub-complexes but we never observed an isolated IM sub-complex without the PL sub-complex in wild type cells. In  
148 this scenario, the IM sub-complex subsequently forms in the vicinity of the PL sub-complex and the two sub-  
149 complexes find each other, stimulating synthesis of the flagellum through the pre-formed bend in the outer  
150 membrane made by the PL sub-complex. The protein densities in the center of the PL sub-complexes extending  
151 inward might be involved in this process of locking the two sub-complexes together. Since the PL sub-complex is  
152 anchored to the peptidoglycan cell wall, we speculate that the IM sub-complex moves to find the PL sub-complex  
153 and not vice versa. This model leaves open the questions of how the two sub-complexes would assemble, and the  
154 mechanism by which they would find each other. Interestingly, this mechanism is reminiscent of the “outside-in”  
155 assembly mechanism of the closely-related T3SS injectisome in *Yersinia*, which is thought to assemble from the  
156 outside in, proceeding from the initial formation of a ring complex in the outer membrane<sup>43</sup>.

157  
158 Previous EM studies of lysed *Salmonella* mutants revealed ring structures in the outer membrane corresponding to  
159 PL sub-complexes. These complexes were seen in mutants lacking the hook component, but not those lacking rod  
160 components<sup>25</sup>. It is therefore possible that the flagellar assembly mechanism of peritrichous species like *Salmonella*  
161 may differ from that of species with a single polar flagellum like the ones we imaged here.

162

163 Finally, it is possible that at least some of the PL sub-complexes we observed were the last stable complex in a  
164 disassembly process. For instance, in *L. pneumophila* cells with a large intermembrane distance, the stable PL and  
165 IM sub-complexes could have been pulled apart. For several reasons, however, we favor the idea that most of the PL  
166 sub-complexes we observed were assembly intermediates. First, in *S. oneidensis* mutants unable to fully assemble  
167 flagella, as well as in a lysed *L. pneumophila* cell, we observed clear disassembly intermediates (containing  
168 periplasmic components secreted by an export apparatus that was no longer associated with the complex). Such  
169 intermediates are consistent with those previously reported in *Caulobacter crescentus*<sup>34-37</sup>. The fact that we did not  
170 see any such intermediates in intact wild type cells indicates that those cells were not frequently disassembling  
171 flagella. This is unsurprising given the great energetic cost of assembling a flagellum – consuming ~2% of a cell's  
172 total energy and ~8% of its total protein (see <sup>44</sup> and references therein) and taking a generation-time or longer to  
173 reach full length<sup>22</sup>. Second, we observed PL sub-complexes next to fully assembled flagella at the cell pole, and  
174 often in multiple copies (Fig. S3). Due to the energetic and temporal cost just described, we think it is unlikely that  
175 all of these cells had gone through multiple rounds of loss and assembly of their single flagellum, starting from  
176 scratch each time. In fact, a study in *Salmonella* found that cells repair flagella which are broken mechanically, only  
177 replacing them de novo if the filament is denatured using a laser pulse<sup>45</sup>. We think it is more likely that cells  
178 assemble multiple PL sub-complexes, perhaps to aid in the capture of the IM sub-complex.

179

#### 180 **Acknowledgments:**

181 This work was supported by the National Institute of Health (NIH, grant R01 AI127401 to G.J.J.). M.K. is supported  
182 by a postdoctoral Rubicon fellowship from De Nederlandse Organisatie voor Wetenschappelijk Onderzoek (NWO).  
183 S.P. and M.Y.E.-N. are supported by the Air Force Office of Scientific Research Presidential Early Career Award  
184 for Scientists and Engineers (FA955014-1-0294, to M.Y.E.-N.).

185

#### 186 **References:**

- 187 1. Purcell, E. M. Life at low Reynolds number. *Am. J. Phys.* **45**, 3–11 (1977).
- 188 2. Manson, M. D., Tedesco, P., Berg, H. C., Harold, F. M. & Van der Drift, C. A protonmotive force drives  
189 bacterial flagella. *Proc. Natl. Acad. Sci.* **74**, 3060–3064 (1977).

- 190 3. Hirota, N., Kitada, M. & Imae, Y. Flagellar motors of alkalophilic *bacillus* are powered by an electrochemical  
191 potential gradient of Na<sup>+</sup>. *FEBS Lett.* **132**, 278–280 (1981).
- 192 4. Macnab, R. M. The bacterial flagellum: reversible rotary propellor and type III export apparatus. *J. Bacteriol.*  
193 **181**, 7149–7153 (1999).
- 194 5. Berg, H. C. The rotary motor of bacterial flagella. *Annu. Rev. Biochem.* **72**, 19–54 (2003).
- 195 6. Sowa, Y. & Berry, R. M. Bacterial flagellar motor. *Q. Rev. Biophys.* **41**, (2008).
- 196 7. Koebnik, R. Proposal for a peptidoglycan-associating alpha-helical motif in the C-terminal regions of some  
197 bacterial cell-surface proteins. *Mol. Microbiol.* **16**, 1269–1270 (1995).
- 198 8. Morimoto, Y. & Minamino, T. Structure and function of the bi-directional bacterial flagellar motor.  
199 *Biomolecules* **4**, 217–234 (2014).
- 200 9. Kojima, S. *et al.* The helix rearrangement in the periplasmic domain of the flagellar stator B subunit activates  
201 peptidoglycan binding and ion influx. *Structure* **26**, 590-598.e5 (2018).
- 202 10. Francis, N. R., Sosinsky, G. E., Thomas, D. & DeRosier, D. J. Isolation, characterization and structure of  
203 bacterial flagellar motors containing the switch complex. *J. Mol. Biol.* **235**, 1261–1270 (1994).
- 204 11. Thomas, D. R., Francis, N. R., Xu, C. & DeRosier, D. J. The three-dimensional structure of the flagellar rotor  
205 from a clockwise-locked mutant of *Salmonella enterica* Serovar Typhimurium. *J. Bacteriol.* **188**, 7039–7048  
206 (2006).
- 207 12. Gan, L. & Jensen, G. J. Electron tomography of cells. *Q. Rev. Biophys.* **45**, 27–56 (2012).
- 208 13. Oikonomou, C. M. & Jensen, G. J. A new view into prokaryotic cell biology from electron cryotomography.  
209 *Nat. Rev. Microbiol.* **15**, 128 (2017).
- 210 14. Chen, S. *et al.* Structural diversity of bacterial flagellar motors: Structural diversity of bacterial flagellar motors.  
211 *EMBO J.* **30**, 2972–2981 (2011).
- 212 15. Zhao, X., Norris, S. J. & Liu, J. Molecular architecture of the bacterial flagellar motor in cells. *Biochemistry* **53**,  
213 4323–4333 (2014).
- 214 16. Zhu, S. *et al.* Molecular architecture of the sheathed polar flagellum in *Vibrio alginolyticus*. *Proc. Natl. Acad.*  
215 *Sci.* **114**, 10966-10971 (2017).
- 216 17. Minamino, T. & Imada, K. The bacterial flagellar motor and its structural diversity. *Trends Microbiol.* **23**, 267–  
217 274 (2015).



- 218 18. Terashima, H., Kawamoto, A., Morimoto, Y. V., Imada, K. & Minamino, T. Structural differences in the  
219 bacterial flagellar motor among bacterial species. *Biophys. Physicobiology* **14**, 191–198 (2017).
- 220 19. Beeby, M. *et al.* Diverse high-torque bacterial flagellar motors assemble wider stator rings using a conserved  
221 protein scaffold. *Proc. Natl. Acad. Sci.* **113**, E1917–E1926 (2016).
- 222 20. Chaban, B., Coleman, I. & Beeby, M. Evolution of higher torque in Campylobacter-type bacterial flagellar  
223 motors. *Sci. Rep.* **8**, (2018).
- 224 21. Stock, D., Namba, K. & Lee, L. K. Nanorotors and self-assembling macromolecular machines: The torque ring  
225 of the bacterial flagellar motor. *Curr. Opin. Biotechnol.* **23**, 545–554 (2012).
- 226 22. Macnab, R. M. How bacteria assemble flagella. *Annu. Rev. Microbiol.* **57**, 77–100 (2003).
- 227 23. McCarter, L. L. Polar flagellar motility of the Vibrionaceae. *Microbiol. Mol. Biol. Rev.* **65**, 445–462 (2001).
- 228 24. Jones, C. J. & Macnab, R. M. Flagellar assembly in *Salmonella typhimurium*: analysis with temperature-  
229 sensitive mutants. *J. Bacteriol.* **172**, 1327–1339 (1990).
- 230 25. Kubori, T., Shimamoto, N., Yamaguchi, S., Namba, K. & Aizawa, S.-I. Morphological pathway of flagellar  
231 assembly in *Salmonella typhimurium*. *J. Mol. Biol.* **226**, 433–446 (1992).
- 232 26. Li, H. & Sourjik, V. Assembly and stability of flagellar motor in *Escherichia coli*: Flagellar motor assembly.  
233 *Mol. Microbiol.* **80**, 886–899 (2011).
- 234 27. Homma, M., Komeda, Y., Iino, T. & Macnab, R. M. The flaFIX gene product of *Salmonella typhimurium* is a  
235 flagellar basal body component with a signal peptide for export. *J. Bacteriol.* **169**, 1493–1498 (1987).
- 236 28. Jones, C. J., Macnab, R. M., Okino, H. & Aizawa, S.-I. Stoichiometric analysis of the flagellar hook-(basal-  
237 body) complex of *Salmonella typhimurium*. *J. Mol. Biol.* **212**, 377–387 (1990).
- 238 29. Oliver, D. Protein Secretion in *Escherichia Coli*. *Annu. Rev. Microbiol.* **39**, 615–648 (1985).
- 239 30. Kaplan, M. *et al.* The structural complexity of the bacterial flagellar motor is related to the type of its torque-  
240 generating stators. *bioRxiv* (2018).
- 241 31. Feldman, M. *et al.* Role of flagella in pathogenesis of *Pseudomonas aeruginosa* pulmonary infection. *Infect.*  
242 *Immun.* **66**, 43–51 (1998).
- 243 32. Appelt, S. & Heuner, K. The flagellar regulon of *Legionella*—A Review. *Front. Cell. Infect. Microbiol.* **7**,  
244 (2017).

- 245 33. Subramanian, P., Pirbadian, S., El-Naggar, M. Y. & Jensen, G. J. Ultrastructure of *Shewanella oneidensis* MR-  
246 1 nanowires revealed by electron cryotomography. *Proc. Natl. Acad. Sci.* **115**, E3246–E3255 (2018).
- 247 34. Jenal, U. & Shapiro, L. Cell cycle-controlled proteolysis of a flagellar motor protein that is asymmetrically  
248 distributed in the *Caulobacter* predivisional cell. *EMBO J.* **15**, 2393–2406 (1996).
- 249 35. Aldridge, P. & Jenal, U. Cell cycle-dependent degradation of a flagellar motor component requires a novel-type  
250 response regulator. *Mol. Microbiol.* **32**, 379–391 (1999).
- 251 36. Grunenfelder, B. *et al.* Identification of the Protease and the Turnover Signal Responsible for Cell Cycle-  
252 Dependent Degradation of the *Caulobacter* FliF Motor Protein. *J. Bacteriol.* **186**, 4960–4971 (2004).
- 253 37. Kanbe, M. Protease susceptibility of the *Caulobacter crescentus* flagellar hook-basal body: a possible  
254 mechanism of flagellar ejection during cell differentiation. *Microbiology* **151**, 433–438 (2005).
- 255 38. Jenal, U., White, J. & Shapiro, L. *Caulobacter* Flagellar Function, but not Assembly, Requires FliL, a Non-  
256 polarly Localized Membrane Protein Present in all Cell Types. *J. Mol. Biol.* **243**, 227–244 (1994).
- 257 39. Jones, C. J., Homma, M. & Macnab, R. M. Identification of proteins of the outer (L and P) rings of the flagellar  
258 basal body of *Escherichia coli*. *J. Bacteriol.* **169**, 1489–1492 (1987).
- 259 40. Ohnishi, K., Homma, M., Kutsukake, K. & Iino, T. Formation of flagella lacking outer rings by *flaM*, *flaU*, and  
260 *flaY* mutants of *Escherichia coli*. *J. Bacteriol.* **169**, 1485–1488 (1987).
- 261 41. Wu, L., Wang, J., Tang, P., Chen, H. & Gao, H. Genetic and Molecular Characterization of Flagellar Assembly  
262 in *Shewanella oneidensis*. *PLoS ONE* **6**, e21479 (2011).
- 263 42. Qin, Z., Lin, W., Zhu, S., Franco, A. T. & Liu, J. Imaging the Motility and Chemotaxis Machineries in  
264 *Helicobacter pylori* by Cryo-Electron Tomography. *J. Bacteriol.* **199**, e00695-16 (2017).
- 265 43. Diepold, A. *et al.* Deciphering the assembly of the *Yersinia* type III secretion injectisome. *EMBO J.* **29**, 1928–  
266 1940 (2010).
- 267 44. Zhao, K., Liu, M. & Burgess, R. R. Adaptation in bacterial flagellar and motility systems: from regulon  
268 members to ‘foraging’-like behavior in *E. coli*. *Nucleic Acids Res.* **35**, 4441–4452 (2007).
- 269 45. Paradis, G. *et al.* Variability in bacterial flagella re-growth patterns after breakage. *Sci. Rep.* **7**, (2017).
- 270 46. Pirbadian, S. *et al.* *Shewanella oneidensis* MR-1 nanowires are outer membrane and periplasmic extensions of  
271 the extracellular electron transport components. *Proc. Natl. Acad. Sci.* **111**, 12883–12888 (2014).

- 272 47. Saltikov, C. W. & Newman, D. K. Genetic identification of a respiratory arsenate reductase. *Proc. Natl. Acad.*  
273 *Sci.* **100**, 10983–10988 (2003).
- 274 48. Zheng, S. Q. *et al.* UCSF tomography: an integrated software suite for real-time electron microscopic  
275 tomographic data collection, alignment, and reconstruction. *J. Struct. Biol.* **157**, 138–147 (2007).
- 276 49. Kremer, J. R., Mastronarde, D. N. & McIntosh, J. R. Computer visualization of three-dimensional image data  
277 using IMOD. *J. Struct. Biol.* **116**, 71–76 (1996).
- 278 50. Agulleiro, J. I. & Fernandez, J. J. Fast tomographic reconstruction on multicore computers. *Bioinformatics* **27**,  
279 582–583 (2011).
- 280 51. Nicastro, D. The molecular architecture of axonemes revealed by cryoelectron tomography. *Science* **313**, 944–  
281 948 (2006).
- 282
- 283

284  
285 **Figures:**  
286  
287 **Figure 1**

288

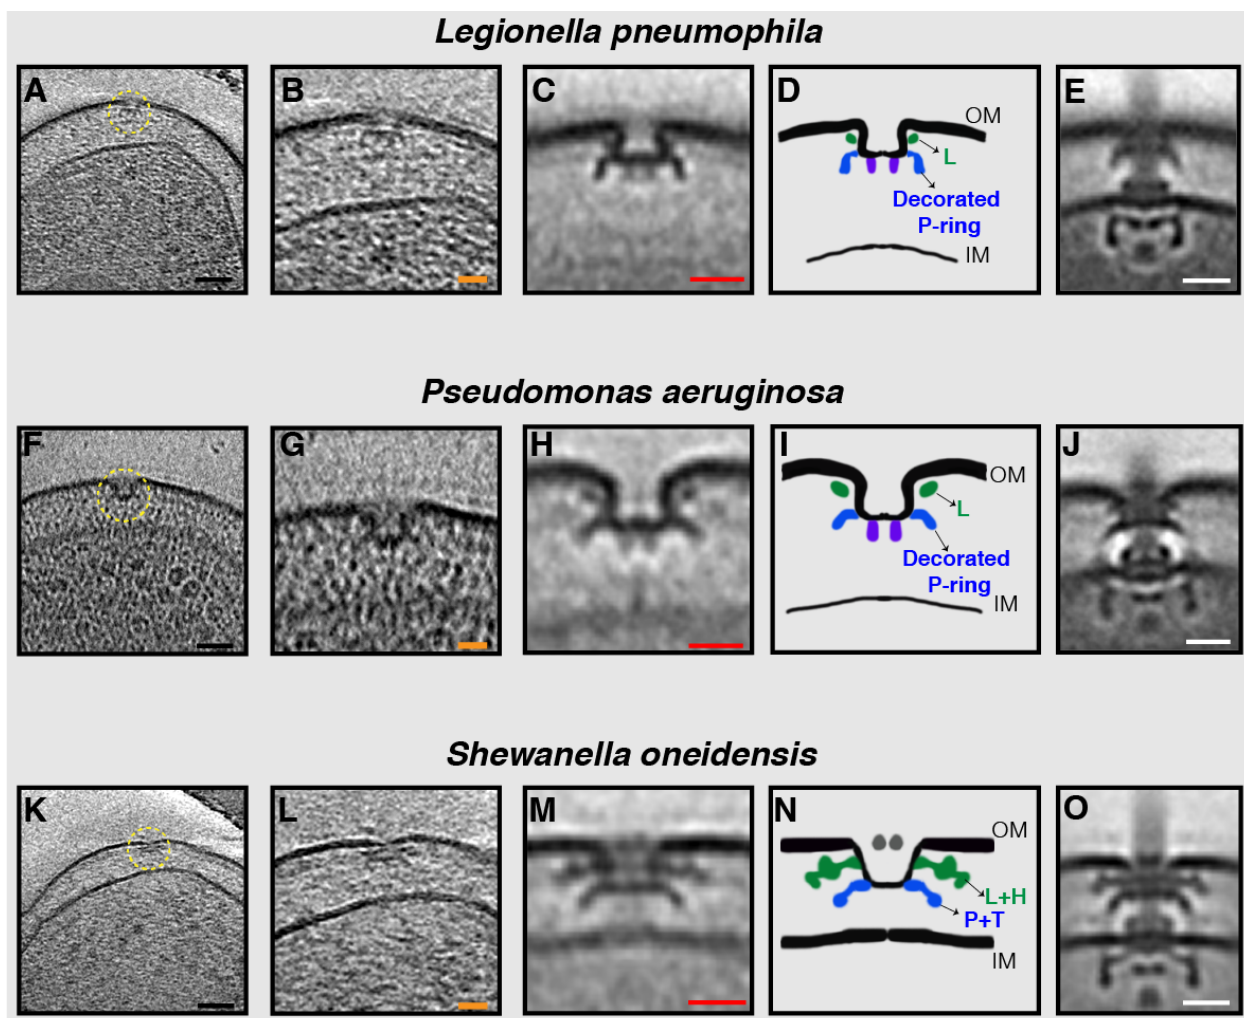

289

290

291 **Figure 2:**

292

293

294

295

296

297

298

299

300

301

302

303

304

305

306

307

308

309

310

311

312

313

314

315

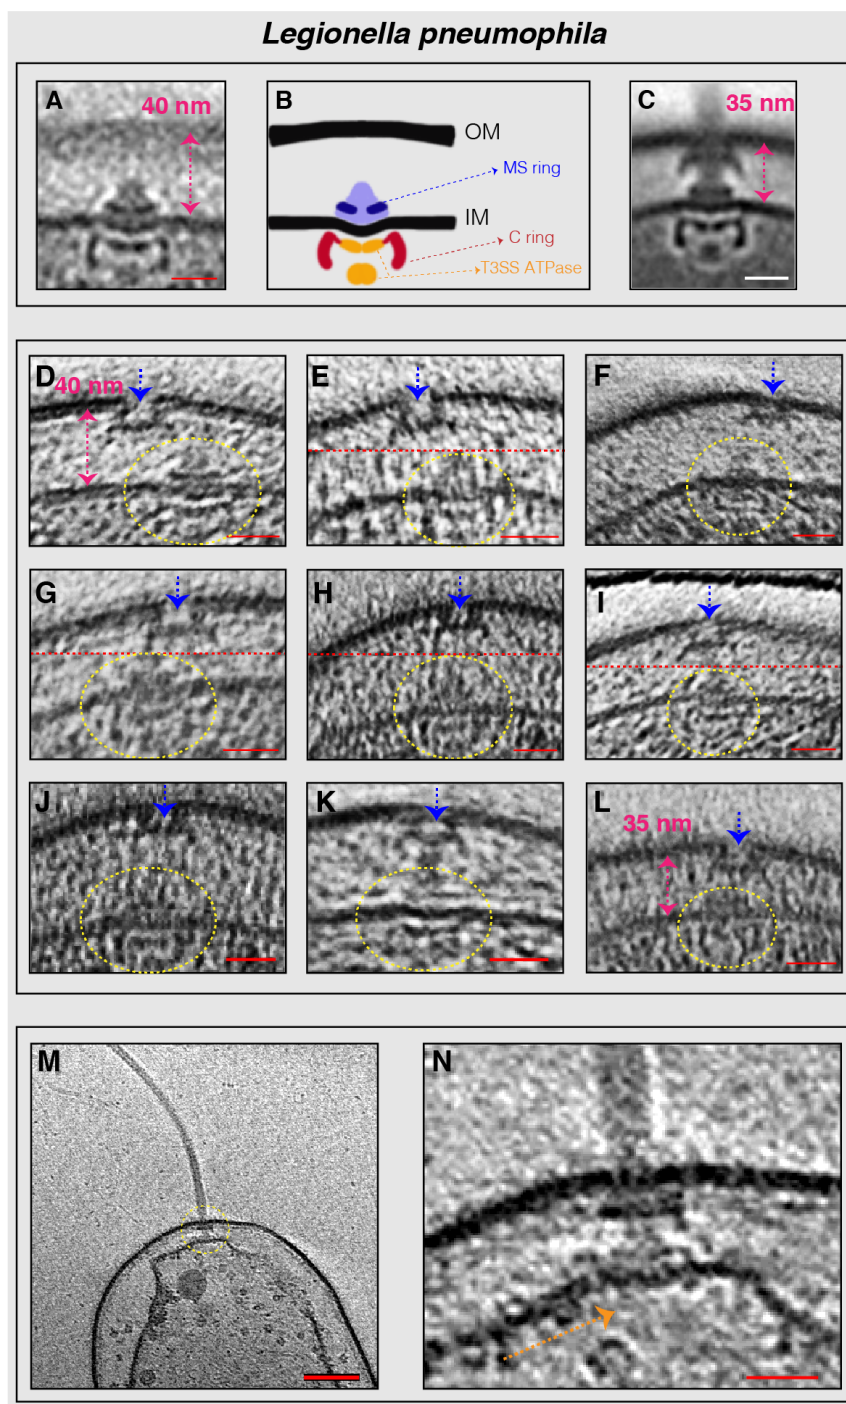

316 **Figure 3:**

317

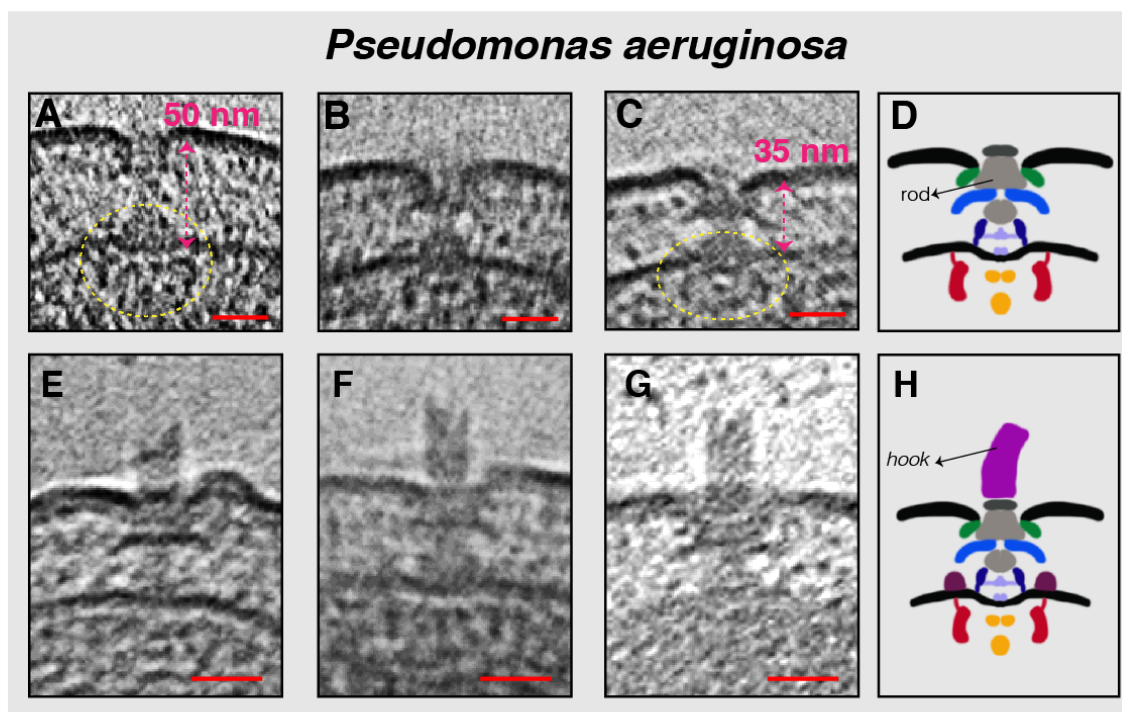

318

319

320

321 **Figure 4:**

322

323

324

325

326

327

328

329

330

331

332

333

334

335

336

337

338

339

340

341

342

343

344

345

346

347

348

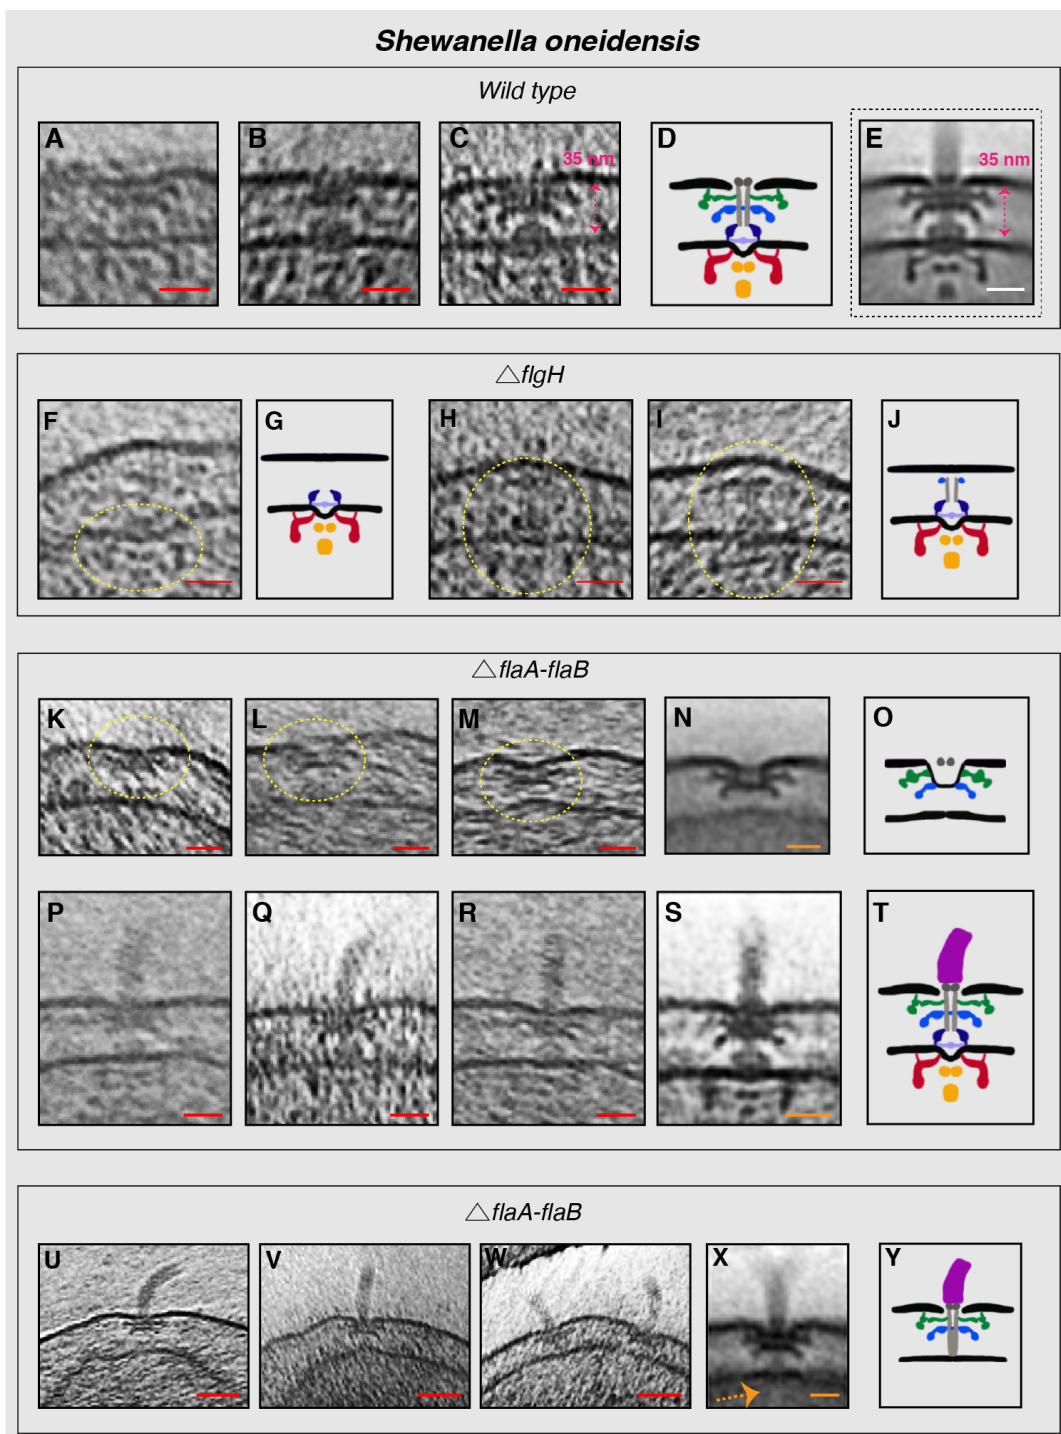

349 **Figure 5:**

350

351

352

353

354

355

356

357

358

359

360

361

362

363

364

365

366

367

368

369

370

371

372

373

374

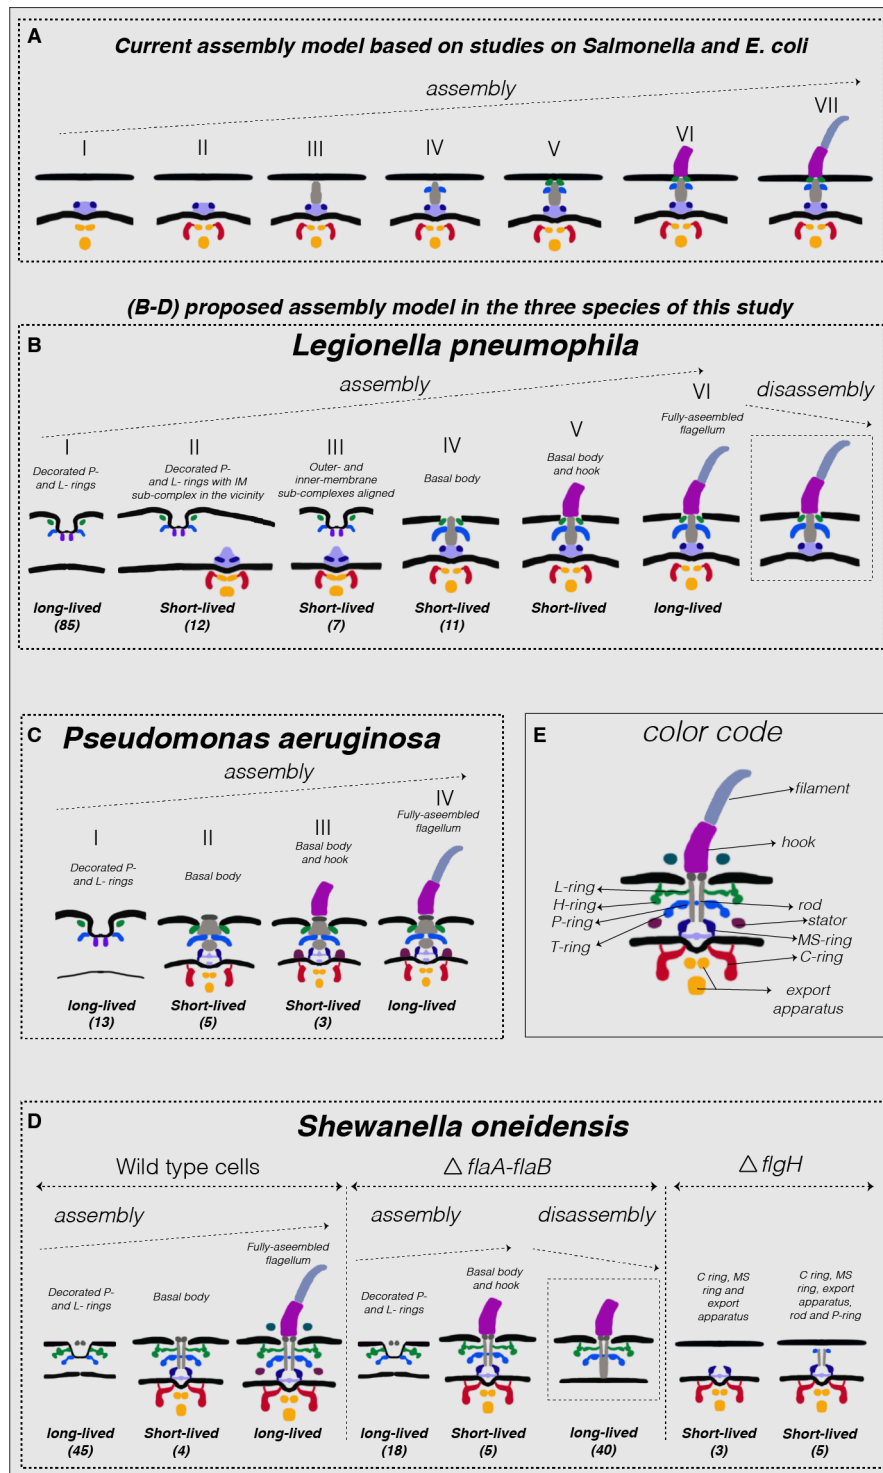



375 **Figure legends:**

376 **Figure 1: Stable PL sub-complexes in three bacterial species imaged by ECT. (A, F, K)** slices through electron  
377 cryo-tomograms of *L. pneumophila*, *P. aeruginosa*, and *S. oneidensis* cells, respectively, highlighting a PL sub-  
378 complex in the outer membrane (dashed yellow circle). **B, G, L)** Enlarged views of the complexes. **C, H, M)** Sub-  
379 tomogram averages of PL sub-complexes from each species. **D, I, N)** Schematic representations of the sub-  
380 tomogram averages with different rings colored and labeled. **E, J, O)** Sub-tomogram averages of fully-assembled  
381 flagella from each species for comparison. Scale bars: (black) 50 nm, (orange) 25 nm, (red and white) 20 nm.

382  
383 **Figure 2: Flagellar sub-complexes in *L. pneumophila*.** **(A)** Sub-tomogram average of the IM sub-complex  
384 constituting the C- ring, MS-ring and export apparatus. **(B)** Schematic representation of the sub-tomogram average  
385 shown in (A) highlighting the different parts of the complex. **(C)** Sub-tomogram average of the motor of fully-  
386 assembled flagella highlighting the distance between the inner and outer membranes. **(D-L)** Slices through electron  
387 cryo-tomograms showing neighboring PL and IM sub-complexes. Dashed-yellow circles highlight the IM sub-  
388 complex while dashed-blue arrows highlight the PL sub-complex. Dashed-pink arrows highlight the distance  
389 between the inner and outer membranes. Dashed-red lines mark the border between two images used to make a  
390 composite image when the PL and IM sub-complexes were found at different Z-levels in the tomogram. **(M)** Central  
391 slice through an electron cryo-tomogram of a lysed cell. The dashed-yellow circle highlights the flagellar motor. **(N)**  
392 Enlarged view of the same slice shown in M. The absence of the C-ring and the export apparatus is highlighted by  
393 the dashed-orange arrow. Scale bars: (A, C) 20 nm, (D-L, N) 25 nm, (M) 100 nm.

394  
395 **Figure 3: Flagellar sub-complexes in *P. aeruginosa*** **(A-C)** Slices through electron cryo-tomograms showing fully-  
396 assembled motors without the hook and filament. The distance between the inner and outer membranes is  
397 highlighted by the dashed-pink arrows. The dashed-yellow circles indicate the IM sub-complex. **(D)** Schematic  
398 representation of the *P. aeruginosa* motors lacking the hook and filament shown in (A-C). **(E-G)** Slices through  
399 electron cryo-tomograms showing fully-assembled motors with the hook and lacking the filament. **(H)** Schematic  
400 representation of the motors with the hook shown in (E-G). Scale bars are 25 nm.

401

402 **Figure 4: Flagellar sub-complexes in *S. oneidensis* wild type and mutant cells.** (A-C) Slices through electron  
403 cryo-tomograms of wild type cells showing fully-assembled motors without the hook and filament. The dashed-pink  
404 arrow highlights the distance between the inner and outer membranes. **D)** Schematic representation of the motors  
405 lacking the hook and filament shown in (A-C). **E)** Sub-tomogram average of the motor of fully-assembled flagella  
406 with the distance between the inner and outer membranes highlighted by the dashed-pink arrow. **F)** Slice through an  
407 electron cryo-tomogram of a *AflgH* cell showing an IM sub-complex, indicated by the dashed-yellow circle. **G)**  
408 Schematic representation of the IM sub-complex shown in F. **H & I)** Slices through electron cryo-tomograms of  
409 *AflgH* cells showing the IM sub-complex with the rod and the P-ring, indicated by the dashed-yellow circles. **J)**  
410 Schematic representation of the structures shown in H and I. **K-M)** Slices through electron cryo-tomograms of  
411 *AflaA/B* cells highlighting PL sub-complexes (dashed-yellow circles). **N)** Sub-tomogram average of the PL sub-  
412 complexes in *AflaA/B* cells. **O)** Schematic representation of the sub-tomogram average shown in N. **P-R)** Slices  
413 through electron cryo-tomograms of *AflaA/B* cells highlighting the flagellar motor and the hook (without the  
414 filament). **S)** Sub-tomogram average of the flagellar motor and the hook structure found in *AflaA/B* cells. **T)**  
415 Schematic representation of the sub-tomogram average shown in S. **U-W)** Slices through electron cryo-tomograms  
416 of *AflaA/B* cells illustrating a disassembly product constituting the PL sub-complex, the rod and the hook. **X)** Sub-  
417 tomogram average of the disassembly complex shown in U-W. The dashed-orange arrow indicates the absence of  
418 the IM sub-complex in this structure. **Y)** Schematic representation of the disassembly product found in *AflaA/B* cells.  
419 Scale bars: (red) 25 nm, (orange and white) 20 nm.

420

421 **Figure 5: Summary of observations and proposed model of assembly.** (A) Schematic representation of the  
422 previous model of the flagellar assembly pathway in *Salmonella* based on references<sup>22,24-26</sup>. **B-D)** Schematic  
423 representations of the various subcomplexes observed in this study in *L. pneumophila*, *P. aeruginosa* and *S.*  
424 *oneidensis* (wild type and mutant strains), respectively. Numbers in parentheses represent the number of particles  
425 observed in that particular state. In each case, the observed sub-complexes are arranged according to the assembly  
426 model proposed in the text. **E)** Labeled schematic representation of the fully-assembled flagellum in *S. oneidensis*  
427 for reference. Note that the same color code applies to all species shown.

428

429 **Supplementary Information**

430

431

432

433

434

435

436

437

438

439

440

441

442

443

444

445

446

447

448

449

450

451

452

453

454

455

456

457

458

459

460

461

462

463

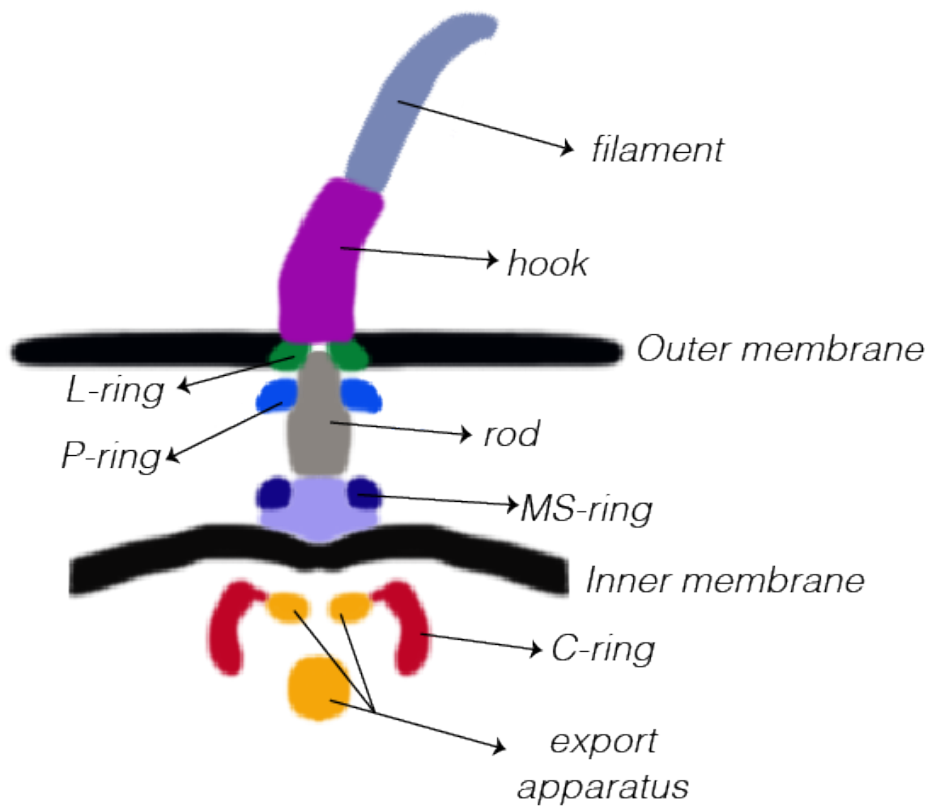

**Figure S1:** A schematic representation of the *Salmonella* flagellar motor highlighting the different parts of the structure.

464  
465  
466  
467  
468  
469  
470  
471  
472  
473  
474  
475  
476  
477  
478  
479  
480  
481  
482  
483  
484  
485  
486  
487  
488  
489  
490  
491  
492  
493  
494  
495  
496  
497  
498  
499  
500  
501  
502

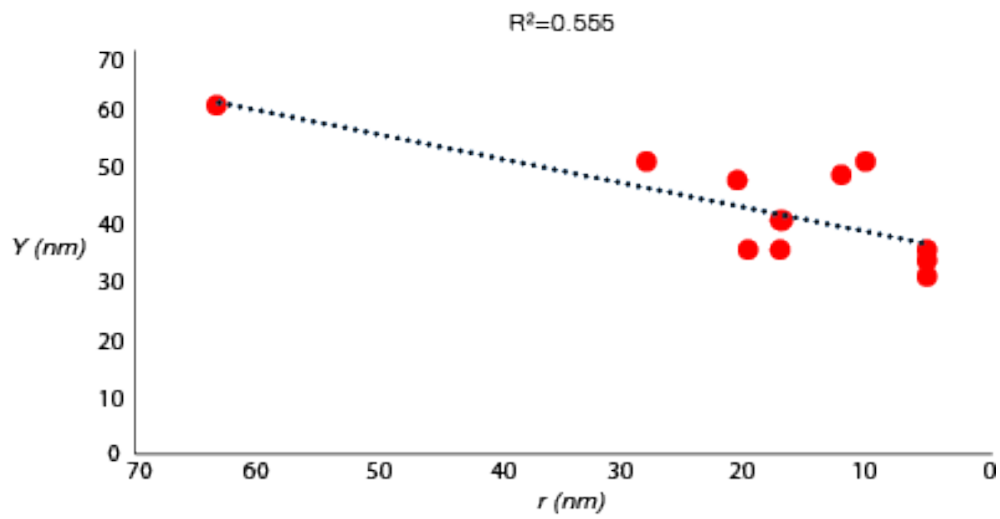

**Figure S2:** Correlation between lateral displacement of the IM and PL sub-complexes ( $r$ ) and the distance between the inner and outer membranes ( $Y$ ) in *L. pneumophila*. The dotted line is the trend line with the equation  $Y=0.4239X + 34.18$ .

503

504

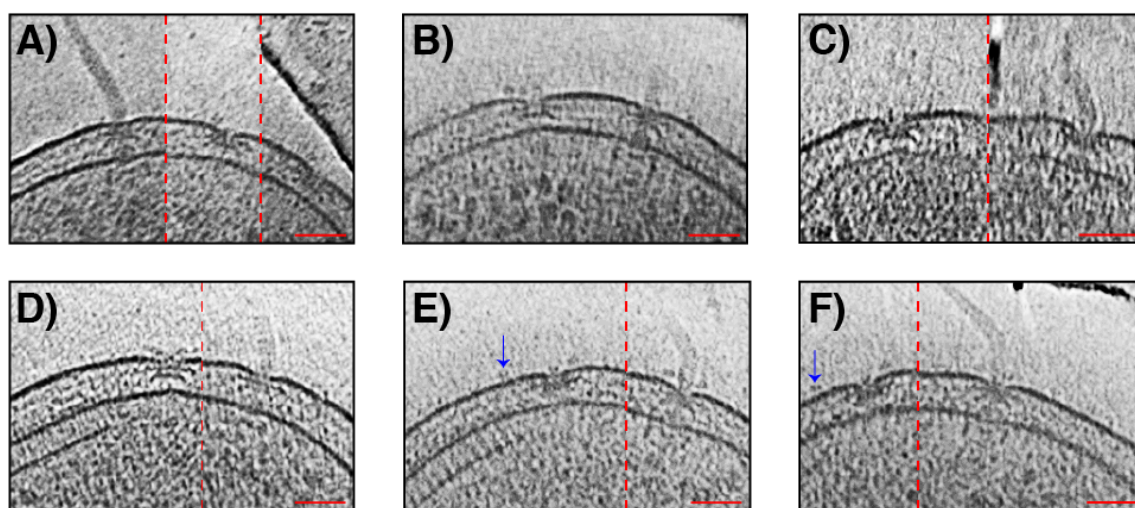

505

506 **Figure S3:** Examples of PL sub-complexes next to fully-assembled flagella in wild type *S. oneidensis* cells. Note  
507 that in some examples extracellular densities are visible next to PL sub-complexes. These extracellular densities do  
508 not appear in the sub-tomogram average as they were at different locations relative to the sub-complex and not  
509 present near all sub-complexes. They can also be seen at a distance from the PL sub-complexes (as in E and F, blue  
510 arrows) suggesting that they are not specific to PL sub-complexes. Dashed red lines indicate images that are  
511 composites of two (or more) images to show particles of interest at different z levels in the tomogram. Scale bars are  
512 50 nm.

513

514

515

516

517

518

519

520

521

522

523

524 **Table S1:** Distance between IM and PL sub-complexes in the three Cartesian axes ( $x, y, z$ ) in *L. pneumophila*.

525

526

527

| Number of Tomogram | $\sim r$ (nm) | $\sim Y$ -distance (nm)<br>(distance between the inner and outer membranes) | $\sim Z$ -distance (nm) | $\sim X$ -distance (nm) |
|--------------------|---------------|-----------------------------------------------------------------------------|-------------------------|-------------------------|
| 1                  | 63.2          | 60                                                                          | 20                      | 60                      |
| 2                  | 28            | 40                                                                          | 0                       | 28                      |
| 3                  | 20.5          | 35                                                                          | 10                      | 18                      |
| 4                  | 19.6          | 47                                                                          | 8                       | 18                      |
| 5                  | 17            | 35                                                                          | 11                      | 13                      |
| 6                  | 17            | 50                                                                          | 0                       | 10                      |
| 7                  | 16.7          | 40                                                                          | 16                      | 5                       |
| 8                  | 12            | 48                                                                          | 0                       | 12                      |
| 9                  | 10            | 50                                                                          | 0                       | 17                      |
| 10                 | 5             | 33                                                                          | 0                       | 5                       |
| 11                 | 5             | 32                                                                          | 0                       | 5                       |
| 12                 | 5             | 35                                                                          | 0                       | 5                       |

528

529

530  $r = \sqrt{(x^2 + z^2)}$  is the lateral displacement between the IM sub-complex and the PL sub-complex.

531

532

533 **Supplementary movies:**

534

535 **Movie S1:** Electron cryo-tomogram of a *L. pneumophila* cell highlighting the presence of independent PL and IM-  
536 sub-complexes.

537

538 **Movie S2:** Electron cryo-tomogram of a *L. pneumophila* cell highlighting the presence of independent PL and IM-  
539 sub-complexes.

540

541 **Movie S3:** Electron cryo-tomogram of a  $\Delta$ *flgH* *S. oneidensis* cell. No PL sub-complexes or flagella were seen in  
542 these cells.

543

544 **Movie S4:** Electron cryo-tomogram of a  $\Delta$ *flaA/flaB* *S. oneidensis* cell highlighting the presence of two complexes  
545 constituting the PL sub-complex, the hook and the rod.

546

547

548

549

550

551

552

553

554

555

556

557

558

559

560

561

562

563

564

565

566

567

568

569

570

571

572

573

574 **Material and Methods**

575

576 **Strains and Growth Conditions**

577 *S. oneidensis* *AflaAflaB* cells were grown using the batch culture method and *S. oneidensis* MR-1 wild-type cells  
578 were grown using either the chemostat or the batch culture methods. Detailed description of both methods can be  
579 found in<sup>33</sup>. Briefly, in the chemostat method, 5 mL of a stationary-phase overnight LB culture was injected into a  
580 continuous flow bioreactor containing an operating liquid volume of 1 L of a defined medium<sup>46</sup>, while dissolved  
581 oxygen tension (DOT) was maintained at 20%. After 20 h, and as the culture reached stationary phase, continuous  
582 flow of the defined medium<sup>46</sup> was started with a dilution rate of 0.05 h<sup>-1</sup> while DOT was still maintained at 20%.  
583 After 48 h of aerobic growth under continuous flow conditions, the DOT was manually reduced to 0%. O<sub>2</sub> served as  
584 the sole terminal electron acceptor throughout the experiment. pH was maintained at 7.0, temperature at 30 °C, and  
585 agitation at 200 rpm. Either 24 or 40 hours after DOT reached 0%, samples were taken from the chemostat for ECT  
586 imaging.

587

588 In the batch culture method, 200 µL of an overnight LB culture of *S. oneidensis* cells was added to each of two  
589 sealed and autoclaved serum bottles containing 60 mL of a defined medium<sup>46</sup>. One of the two bottles acted as a  
590 control and was not used for imaging. To this control bottle, 5 µM resazurin was added to indicate the O<sub>2</sub> levels in  
591 the medium. The bottles were then placed in an incubator at 30 °C, with shaking at 150 rpm until the color due to  
592 resazurin in the control bottle completely faded, indicating anaerobic conditions. At this point, samples were taken  
593 for ECT imaging from the bottle that did not contain resazurin.

594

595 The *AflgH* mutant was constructed by a markerless in-frame deletion in the *S. oneidensis* MR-1 background made by  
596 homologous recombination using the pSMV3 suicide vector<sup>47</sup> containing up- and downstream regions cloned using  
597 BamHI and SacI. The deletion was confirmed by PCR and swim-plate assay (lack of swimming on 0.3% LB agar,  
598 and complementation by plasmid-expressed FlgH) and verified by Sanger sequencing with flanking primers.  
599 Primers for the deletion construct and flanking region are as follows: HdeIUpF,  
600 ACGGGATCCCGCAACGCACAAATGATGCG, HdeIUpR,  
601 CCAGTCGCTCATAAAGAACTGGCTGAGCGCAGCGGCAATAGTAA,  
602 HdeIDnF, TTA CTATTGGCCGCTGCGCTCAGCCAGTTCTTTATGAGCGACTGG,



603 HdeIDnR, ACGGAGCTCGGCGCTGCACCCACTAAGTTT, HdeIFlankF, GGAAGTCGTCGAAGAGGTTGGAC,  
604 HdeIFlankR, CCATGCAAAGCTCCTGCCACTT.

605 *S. oneidensis AflgH* cells were grown aerobically in LB culture at 30 °C to an OD<sub>600</sub> of 2.4–2.8.

606

607 *L. pneumophila* Lp02 strain (*thyA hsdR rpsL*) is a derivative of the clinical isolate *L. pneumophila* Philadelphia-1. *L.*  
608 *pneumophila* cells were grown on ACES [*N*-(2-acetamido) -2-aminoethanesulfonic acid]-buffered charcoal yeast  
609 extract agar (CYE) or in ACES-buffered yeast extract broth (AYE). The culture media (CYE and AYE) were  
610 supplemented with ferric nitrate and cysteine hydrochloride. *L. pneumophila* Lp02 strain is a thymidine auxotroph,  
611 so cells were grown in the presence of thymidine (100 µg/ml). Cells were grown to early stationary phase (OD<sub>600</sub>  
612 ~2.5) and subsequently harvested for ECT sample preparation.

613

614 *Pseudomonas aeruginosa* PAO1 cells were grown on LB plates overnight at 37 °C. After that, cells were inoculated  
615 into 5 ml MOPS [(3-(*N*-morpholino) propanesulfonic acid)] Minimal Media Limited Nitrogen and grown for ~24  
616 hours at 30 °C.

617

### 618 **ECT sample preparation and imaging**

619 BSA- treated 10-nm colloidal gold solution was mixed with cells from the three species and 4 µL of this mixture  
620 was applied to a glow-discharged, carbon-coated, R2/2, 200 mesh copper Quantifoil grid (Quantifoil Micro Tools)  
621 in a Vitrobot chamber (FEI). Excess liquid was blotted off and the grid was plunge frozen for ECT imaging.  
622 Imaging of all ECT samples of *S. oneidensis* and *P. aeruginosa* was performed on an FEI Polara 300-keV field  
623 emission gun electron microscope (FEI company, Hillsboro, OR, USA) equipped with a Gatan image filter and K2  
624 Summit direct electron detector in counting mode (Gatan, Pleasanton, CA, USA). *L. pneumophila* cells were imaged  
625 using an FEI Titan Krios 300 kV field emission gun transmission electron microscope equipped with a Gatan  
626 imaging filter and a K2 Summit direct detector in counting mode (Gatan). Data were collected using the UCSF  
627 Tomography software<sup>48</sup>, with each tilt series ranging from -60° to 60° in 1° increments, and an underfocus of ~5–10  
628 µm. A cumulative electron dose of ~130–160 e<sup>-</sup>/Å<sup>2</sup> for each individual tilt series was used for *S. oneidensis* and *P.*  
629 *aeruginosa* while a cumulative dose of ~100 e<sup>-</sup>/Å<sup>2</sup> was used for *L. pneumophila*.

630

631

632 **Image processing and sub-tomogram averaging**

633 The IMOD software package was used to calculate three-dimensional reconstructions of tilt series<sup>49</sup>. Alternatively,  
634 the images were aligned and contrast transfer function corrected using the IMOD software package before producing  
635 SIRT reconstructions using the TOMO3D program<sup>50</sup>. Sub-tomogram averages with 2-fold symmetrization along the  
636 particle Y-axis were produced using the PEET program<sup>51</sup>.
